# Supplementary material
Source: Springer Nature journal article supplement (https://www.springermedizin.de/resource/supplementary/12936_2008_651_MOESM6_ESM.pdf/9547918)
Supplement: MOESM6 [file 9547918]

**Incremental cost per patient: RDT price=\$0.95 (basecase)**

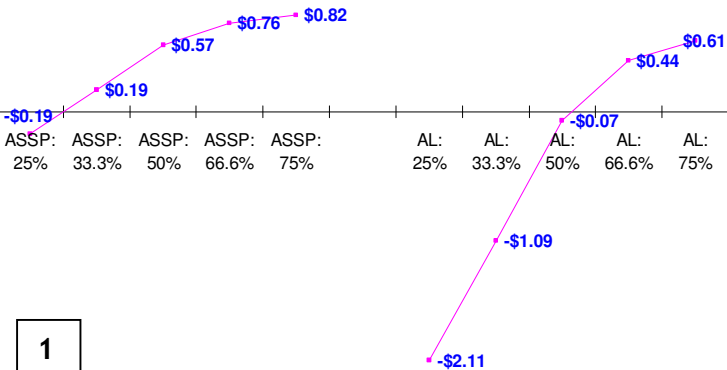

1

**Incremental costs (RDT all vs. RDT in >6 years): RDT price = \$0.95 (base case)**

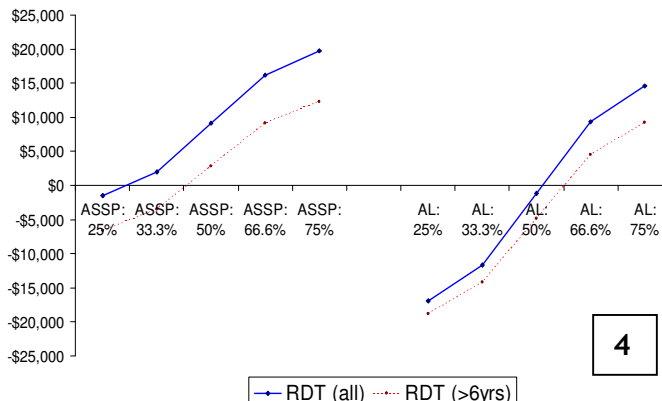

4

**Incremental cost per patient: RDT price=\$0.65**

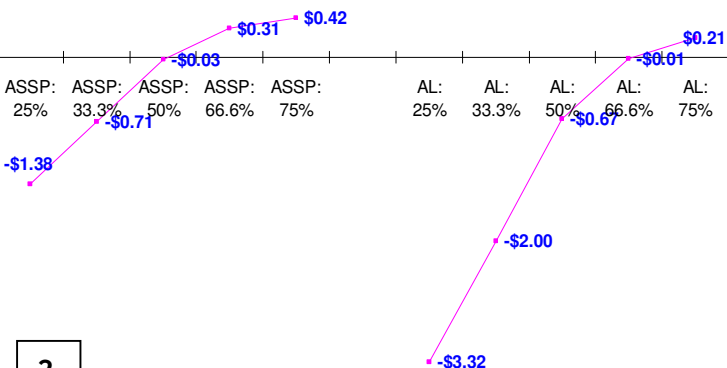

2

**Incremental costs (RDT all vs. RDT in >6 years): RDT price = \$0.65**

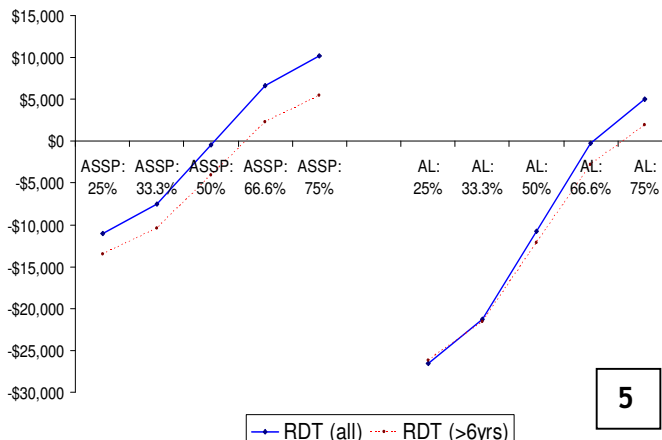

5

**Incremental cost per patient: RDT price= \$0.50**

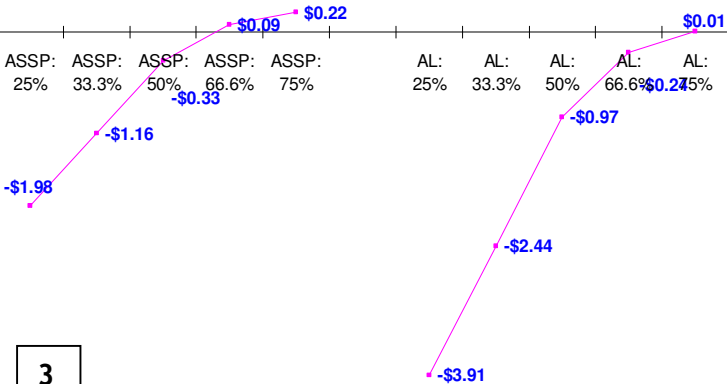

3

**Incremental costs (RDT all vs. RDT in >6 years): RDT price = \$0.50**

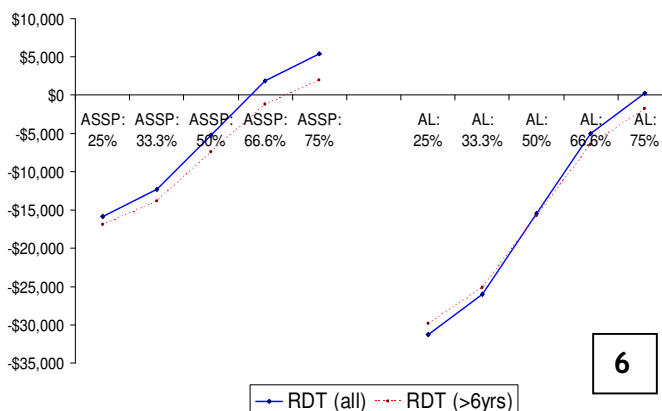

6
